# Supplementary material for: A Scalable and Accurate Targeted Gene Assembly Tool (SAT-Assembler) for Next-Generation Sequencing Data
Source: PubMed Central journal article supplement (PMC4133164; doi:10.1371/journal.pcbi.1003737), 2014-08-14
Supplement: pcbi.1003737.s001.pdf [file pcbi.1003737.s001.pdf]

# Supplementary Material: A Scalable and Accurate Targeted gene Assembly tool (SAT-Assembler) for next-generation sequencing data

Yuan Zhang<sup>1</sup>, Yanni Sun<sup>1,\*</sup>, James R. Cole<sup>2</sup>

**1** Department of Computer Science and Engineering, Michigan State University,  
East Lansing, MI, 48824

**2** Center for Microbial Ecology, Michigan State University, East Lansing, MI, 48824

\* E-mail: yannisun@msu.edu

## 1 Pipeline of SAT-Assembler

In this document, we present the pseudo-codes of five stages of SAT-Assembler.

1. Profile HMM-based homology search
2. Alignment-informed graph construction
3. Pruning and optimization of overlap graphs
4. Guided traversal using multiple types of information
5. Contig scaffolding

## 2 Pseudocodes of SAT-Assembler

---

**Procedure 1** Profile HMM-based homology search

---

**Input:**  $S$ : input sequences;  $M$ : target gene families;  $p$ : the E-value threshold for HMMER.

**Output:**  $H$ : sequences that pass the homology search.

- 1: **for** each target gene family  $M_i$  **do**
  - 2:   align  $S$  against  $M_i$
  - 3:   add sequences that generate E-value  $\leq p$  into  $H_i$
  - 4: **end for**
  - 5: **for** each sequence  $s$  in  $H$  **do**
  - 6:   assign  $s$  to up to three families that generate the best E-values and update  $H$
  - 7: **end for**
  - 8: **return**  $H$
-

---

**Procedure 2** Alignment-informed graph construction

---

**Input:**  $H$ : a list of  $N$  reads sorted by their alignment beginning positions;  $t^*$ : the alignment overlap threshold;  $d^*$ : relative difference threshold.

**Output:**  $G$ : the overlap graph.

```
//add vertices to  $G$ 
1: for  $i = 1 \rightarrow N$  do
2:   create a vertex  $V_i$ 
3:   add  $V_i$  to  $G$ 
4: end for
//add edges to  $G$ 
5: for  $i = 1 \rightarrow N - 1$  do
6:   for  $j = i + 1 \rightarrow N$  do
7:      $t$  =the alignment overlap between  $V_i$  and  $V_j$ 
8:      $k$  =the sequence overlap between  $V_i$  and  $V_j$ 
9:     if  $t \geq t^*$  and  $|t - k|/t \leq d^*$  then
10:      create an edge  $E_{i,j}$ 
11:     else if  $t \leq t^*$  then
12:       break
13:     end if
14:   end for
15: end for
16: return  $G$ 
```

---

---

**Procedure 3** Pruning and optimization of overlap graphs

---

**Input:**  $G$ : the overlap graph.

**Output:**  $G$ : the overlap graph after pruning and optimization.

```
//remove transitive edges
for each edge in  $G$   $\langle V_i, V_j \rangle$  do
  if there is a transitive edge between  $V_i$  and  $V_j$  then
    remove  $\langle V_i, V_j \rangle$ 
  end if
end for
//simplify the overlap graph
while there exists a node that has a single outgoing edge and its successor has a single incoming edge do
  merge these two nodes. Update their corresponding in-edges and out-edges appropriately.
end while
//remove tips
for each node  $v$  in  $G$  do
  if the in-degree or out-degree of  $v$  is zero and its coverage is less than 2 then
    remove  $v$ 
  end if
end for
//remove redundant edges
find all rectangles  $R$  in  $G$ 
for path  $p$  in  $R$  do
  if there is another path that has the same starting and ending nodes and the coverage is higher than  $p$  then
    remove  $p$ 
  end if
end for
```

---

---

**Procedure 4** Guided graph traversal using multiple types of information

---

**Input:**  $G$ : the overlap graph;  $t$ : threshold for critical support.

**Output:**  $C$ : contigs.

```
for node  $v$  in nodes that have zero in-degree do
   $p$  = an empty path
  DFS( $G, v, t, p, C$ )
end for
```

---

---

**Procedure 5** DFS( $G, v, t, p, C$ )

---

**Input:**  $G$ : the overlap graph;  $v$ : the current node;  $p$ : the current path;  $t$ : the threshold for critical support.

**Output:**  $C$ : the contigs.

add  $v$  into  $p$

//evaluate critical support when a non-chimeric node is added.

**if**  $v$  has zero out-degree **then**

    generate the contig from  $p$  and add it into  $C$ .

**else if**  $v$  is a non-chimeric node and the critical support of  $p$  is below  $t$  **then**

    generate the contig from  $p$  and add it into  $C$ .

**for**  $v^*$ : each successor of  $v$  **do**

$p^*$  = an empty path.

        DFS( $G, v^*, p^*, t, C$ )

**end for**

**else**

    DFS( $G, v^*, p, t, C$ )

**end if**

---

---

**Procedure 6** Contig scaffolding

---

**Input:**  $C$ :  $N$  contigs.

**Output:**  $S$ : scaffolds.

//use an indirect graph to keep paired-end reads between contigs.

**for**  $i = 1 \rightarrow N$  **do**

    create a node for each contig

**end for**

create a undirected graph  $H$ .

**for**  $i = 1 \rightarrow N - 1$  **do**

**for**  $j = 2 \rightarrow N$  **do**

**if** there are paired-end reads between  $C_i$  and  $C_j$  **then**

            create an edge  $\langle v_i, v_j \rangle$  in  $H$  for  $C_i$  and  $C_j$

**end if**

**end for**

**end for**

**return** all connected components in  $H$

---

### 3 Experimental data sets and settings

#### 3.1 Experiment on the *Arabidopsis* RNA-Seq data set

- The data set is archived in Short Read Archive (SRA) (<http://www.ncbi.nlm.nih.gov/sra>) under the accession number SRA047499.
- The HMM files can be downloaded from Pfam website: <ftp://ftp.sanger.ac.uk/pub/databases/Pfam/releases/Pfam27.0/Pfam-A.hmm.gz>.
- The command used to run Velvet is: VelvetOptimiser-2.2.5/VelvetOptimiser.pl -s 51 -e 51 -f '-fasta -shortPaired -separate SRR360147.1.fasta SRR360147.2.fasta' -t 4 -optFuncKmer 'n50'

- The command used to run Oases is: `./oases_pipeline.py -m 49 -M 61 -o Result -d "-fasta -shortPaired -separate SRR360147.1.fasta SRR360147.2.fasta" -p "-ins_length 350"`
- The command used to run Trinity is: `./Trinity.pl --seqType fa --left SRR360147.1.fasta --right SRR360147.2.fasta --JM 50G --output Trinity`
- The command used to run IDBA-Tran is: `idba_tran -r SRR360147.both.fasta --mink 35 --maxk 61 --step 2 -o out_dir`
- The command used to run Trans-ABySS is to first run ABySS on a range of *k*-mers: `abyss-pe name=arabidopsis n=10 k=$kmer in='SRR360147_1.fastq SRR360147_2.fastq'`, where *kmer* is a variable from 35 to 61. We then ran trans-abyss pipeline on the assembled contigs.
- The command to run SAT-Assembler is: `./SAT-Assembler.sh -m all_families.hmm -f SRR360147.both.fasta -o out_dir.`

### 3.2 Experiment on the metagenomic data set of synthetic communities

- The data set is archived in SRA under the accession number SRA059004.
- The HMM model of family of butyrate kinase pathway genes can be downloaded from RDP's functional gene repository: [http://fungene.cme.msu.edu/hmm\\_download.spr?hmm\\_id=310](http://fungene.cme.msu.edu/hmm_download.spr?hmm_id=310).
- The command used to run Velvet is: `VelvetOptimiser-2.2.5/VelvetOptimiser.pl -s 53 -e 83 -x 2 -f "-fasta -shortPaired -separate SRR606249_end1.fasta SRR606249_end2.fasta" -t 4 --optFuncKmer 'n50'`
- The command used to run IDBA-UD is: `idba_ud -r SRR606249.both.fasta --mink 53 --maxk 83 --step 2 -o output_dir`
- To run Meta-Velvet, we used the following steps: 1) ran velveth: `velveth Result 55 -fasta -shortPaired -separate SRR606249_end1.fasta SRR606249_end2.fasta`; 2) ran velvetg: `velvetg Result -exp_cov auto -ins_length 260`; 3) ran MetaVelvet: `meta-velvetg Result -ins_length 260`
- The command used to run SAT-Assembler is: `./SAT-Assembler.sh -m buk_rdp.hmm -f SRR606249.both.fasta -o Result`

### 3.3 Experiment on the human gut metagenomic data set

- The data set can be downloaded at: <ftp://public-ftp.hmpdacc.org/Illumina/stool/SRS015217.tar.bz2>.
- The HMM file is the same as in the second experiment.
- The command used to run Velvet is: `VelvetOptimiser-2.2.5/VelvetOptimiser.pl -s 51 -e 51 -f '-fasta -shortPaired -separate SRS015217.1.changed.fa SRS015217.2.changed.fa -fasta -short2 SRS015217.single.changed.fa' -t 4 --optFuncKmer 'n50'`
- The command used to run IDBA-UD is: `idba_ud -r SRS015217.merged.fa -o output --mink 51 --maxk 81 --step 2`
- To run Meta-Velvet, we used the following steps: 1) ran velveth: `velveth Result 51 -fasta -shortPaired -separate SRS015217.1.fa SRS015217.2.fa -fasta -short2 SRS015217.single.fa`; 2) ran velvetg: `velvetg Result -exp_cov auto -ins_length 260`; 3) ran MetaVelvet: `meta-velvetg Result -ins_length 260`

- The command used to run SAT-Assembler is: `./SAT-Assembler -m buk_rdp.hmm -f SRS015217.all.fa -o Result`
