# Supplementary material for: A Scalable and Accurate Targeted Gene Assembly Tool (SAT-Assembler) for Next-Generation Sequencing Data
Source: PLOS journal article supplement (doi:10.1371/journal.pcbi.1003737), 2014-08-14
Supplement: S1 (10.1371/journal.pcbi.1003737.s001) [file journal.pcbi.1003737.s001]

301 Moved Permanently

# Moved Permanently

The document has moved here.

---

Apache Server at www.ploscompbiol.org Port 80
